# Supplementary material for: Synergetic enhancement of electrochemical H2O2 detection in a nitrogen-doped carbon encapsulated FeCo alloy architecture
Source: Royal Society of Chemistry journal article supplement (doi:10.1039/d0an01806f), 2020-11-16
Supplement: d0an01806f1.pdf [file d0an01806f1.pdf]

## Supporting Information

### Synergetic enhancement of electrochemical H<sub>2</sub>O<sub>2</sub> detection in nitrogen-doped carbon encapsulated FeCo alloy architecture

Chunlin Chang, Qian Chen and Guangyin Fan \*

College of Chemistry and Materials Science, Sichuan Normal University, Chengdu  
610068, China.

\* Corresponding author

Email: fanguangyin@sicnu.edu.cn (G. Fan).

## Materials and reagents

Iron(III) nitrate nonahydrate ( $\text{Fe}(\text{NO}_3)_3 \cdot 9\text{H}_2\text{O}$ ), cobalt(II) acetate tetrahydrate ( $\text{Co}(\text{AC})_2 \cdot 4\text{H}_2\text{O}$ ), dopamine (DA), urea (Urea), glucose (Glu), sucrose (Sur), fructose (Fru), ascorbic acid (AA), potassium chloride (KCl) and sodium chloride (NaCl) were purchased from Aladdin Industrial Inc. Ethylene diamine tetraacetic acid tetrasodium ( $\text{EDTA} \cdot 4\text{Na}$ ),  $\text{K}_2\text{HPO}_4 \cdot 3\text{H}_2\text{O}$ ,  $\text{KH}_2\text{PO}_4 \cdot 3\text{H}_2\text{O}$  and hydrogen peroxide ( $\text{H}_2\text{O}_2$ ) were purchased from Chengdu Kelong reagent Co., Ltd. Milk and orange juice purchased from Walmart. The serum samples were obtained from Sichuan University. The phosphate buffer solution (0.1 M, pH = 7.4, PBS) was used as a supporting electrolyte. A stock solution of  $\text{H}_2\text{O}_2$  (10.0 mM) was prepared daily by diluting 35 % (v/v)  $\text{H}_2\text{O}_2$  into 10 mL with distilled water. All of these reagents were analytical grade without further treatment and deionized water (Mill Q, 18.2 M $\Omega$ ) was used.

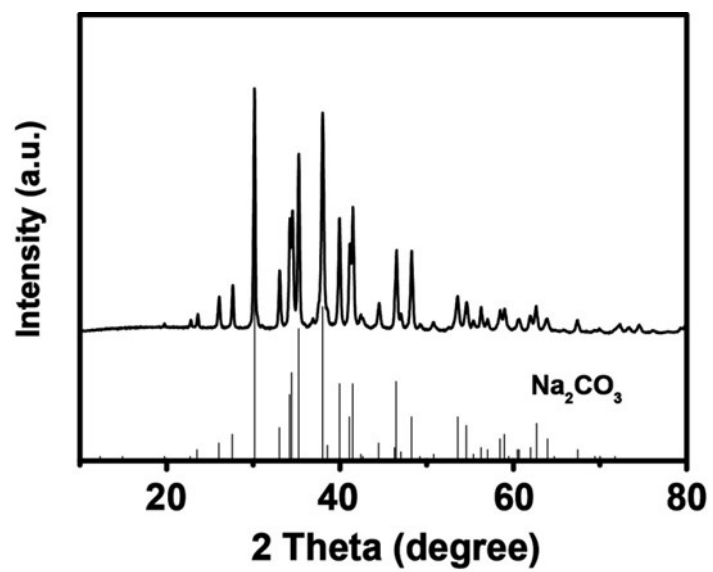

**Fig. S1** XRD pattern of the carbonized product of EDTA-4Na.

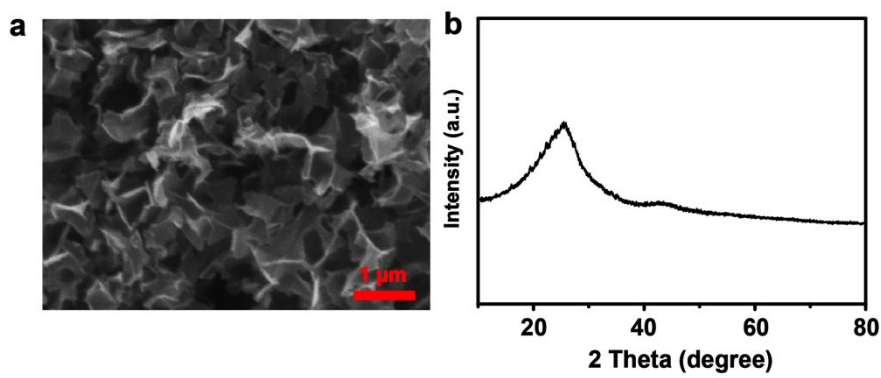

Fig. S2 SEM image (a) and XRD pattern (b) of  $\text{Fe}_{0.06}\text{Co}_{0.04}/\text{NPC}$ .

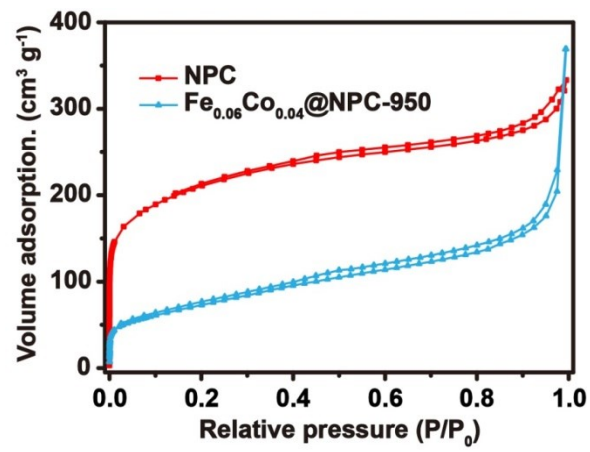

**Fig. S3** N<sub>2</sub> adsorption–desorption isotherms of NPC and Fe<sub>0.06</sub>Co<sub>0.04</sub>@NPC-950.

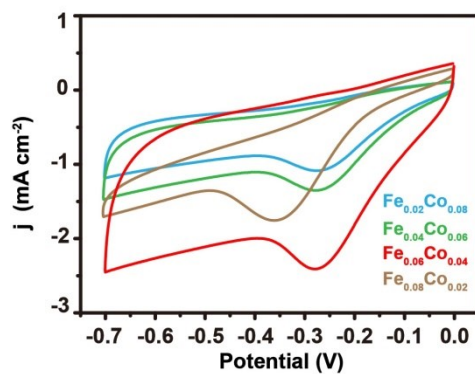

**Fig. S4** CVs of  $\text{Fe}_{0.02}\text{Co}_{0.08}@NPC-950$ ,  $\text{Fe}_{0.04}\text{Co}_{0.06}@NPC-950$ ,  $\text{Fe}_{0.06}\text{Co}_{0.04}@NPC-950$  and  $\text{Fe}_{0.08}\text{Co}_{0.02}@NPC-950$  in 0.1 M PBS at a scan rate of  $50 \text{ mV s}^{-1}$  in 7 mM  $\text{H}_2\text{O}_2$  with potential range of 0 to -0.7 V.

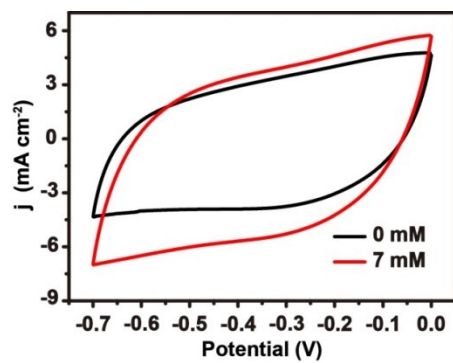

**Fig. S5** CVs of NPC in PBS containing 0 and 7 mM H<sub>2</sub>O<sub>2</sub>.

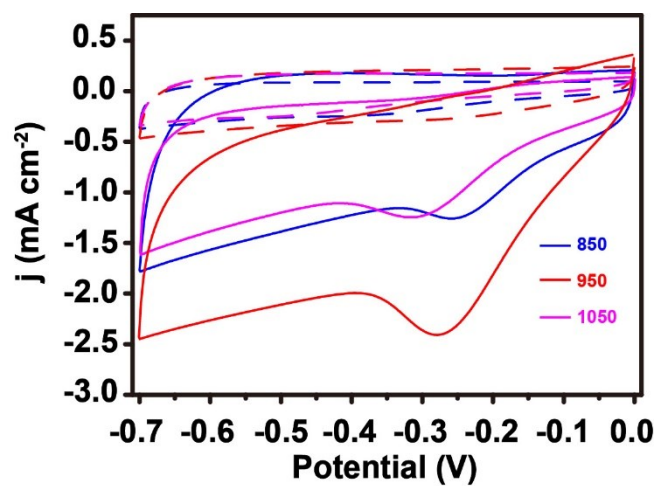

**Fig. S6** CVs of Fe<sub>0.06</sub>Co<sub>0.04</sub>@NPC-850, Fe<sub>0.06</sub>Co<sub>0.04</sub>@NPC-950 and Fe<sub>0.06</sub>Co<sub>0.04</sub>@NPC-1050 in 0.1 M PBS at a scan rate of 50 mV s<sup>-1</sup> in 0 mM and 7 mM H<sub>2</sub>O<sub>2</sub> with potential range of 0 to -0.7 V.



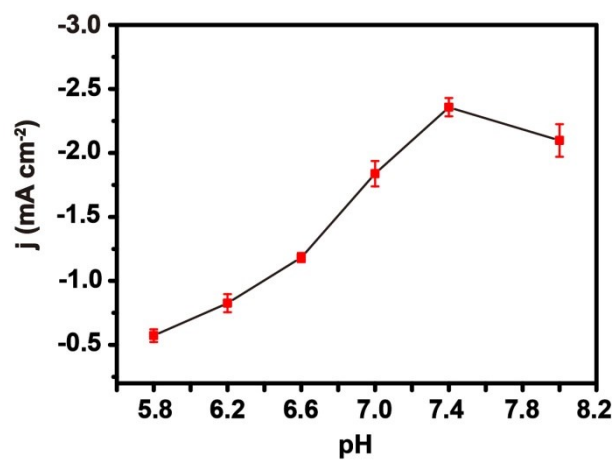

**Fig. S7** Current intensity change with the pH values changed from 5.8 to 8.0.

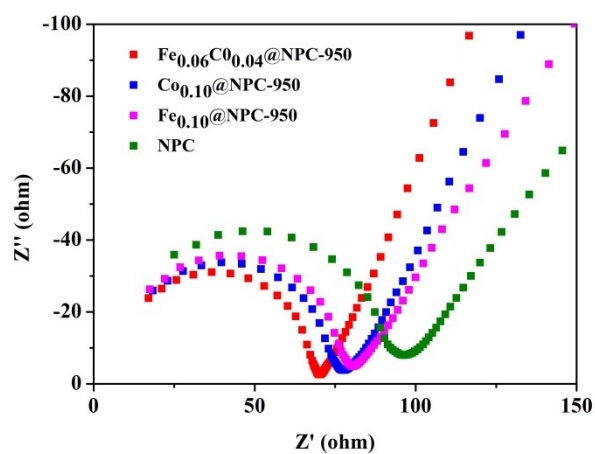

**Fig. S8** EIS of  $\text{Fe}_{0.06}\text{Co}_{0.04}\text{@NPC-950}$ ,  $\text{Fe}_{0.10}\text{@NPC-950}$ ,  $\text{Co}_{0.10}\text{@NPC-950}$  and NPC in 0.1 M PBS containing 1.0 mM  $\text{H}_2\text{O}_2$ .

**Table S1.** The iron and cobalt content of as-prepared catalysts detected by ICP-OES.

| Samples                                    | Concentration<br>(Fe/mg L <sup>-1</sup> ) | Concentration<br>(Co/mg L <sup>-1</sup> ) | Volume<br>(L) | Mass total<br>(mg) | Fe<br>(wt. %) | Co<br>(wt. %) |
|--------------------------------------------|-------------------------------------------|-------------------------------------------|---------------|--------------------|---------------|---------------|
| Fe <sub>0.06</sub> Co <sub>0.04</sub> /NPC | 2.589                                     | 1.464                                     | 10            | 4                  | 0.98          | 0.47          |
| Fe <sub>0.06</sub> Co <sub>0.04</sub> @NPC | 1.533                                     | 0.585                                     | 10            | 4                  | 0.38          | 0.13          |

**Table S2.** Comparison of the sensor modified by Fe<sub>0.06</sub>Co<sub>0.04</sub>@NPC-950 with reported electrochemical H<sub>2</sub>O<sub>2</sub> sensors.

| Catalysts/Electrodes                                                      | Sensitivity<br>( $\mu\text{A mM}^{-1} \text{cm}^{-2}$ ) | Linear range<br>(mM) | Detection limit<br>( $\mu\text{M}$ ) | Reference  |
|---------------------------------------------------------------------------|---------------------------------------------------------|----------------------|--------------------------------------|------------|
| AuPd-PDA                                                                  | 83.1                                                    | 0.001-11.22          | 0.26                                 | 1          |
| CoFe/NGR-2                                                                | 435.7                                                   | 0.001-8.564          | 0.28                                 | 2          |
| Ni <sub>2</sub> P NA/TM                                                   | 690.7                                                   | 0.001-20             | 0.2                                  | 3          |
| Co <sub>3</sub> N NW/TM                                                   | 139.9                                                   | 0.002-28             | 1                                    | 4          |
| Fe <sub>3</sub> O <sub>4</sub> /graphene                                  | 274.15                                                  | 0.008-0.3344         | 0.078                                | 5          |
| GN/FeOOH                                                                  | 265.7                                                   | 0.00025-1.2          | 0.08                                 | 6          |
| ZIF-67/rGO/GCE                                                            | 51.86                                                   | 0.005–2.15           | 1.5                                  | 7          |
|                                                                           | 19.44                                                   | 2.15–11.15           |                                      |            |
| hollow CuO/PANI fibers                                                    | -                                                       | 0.005-9.255          | 0.11                                 | 8          |
| Fe-NGCs                                                                   | 184.4                                                   | 0.001-5              | 0.53z.star                           | 9          |
| MXene/NiCo <sub>2</sub> S <sub>4</sub>                                    | 267                                                     | -                    | 0.193                                | 10         |
| Co@MOF-808                                                                | 382.27                                                  | 0.01-0.45            | 1.3                                  | 11         |
| 3D Co <sub>0.6</sub> Ni <sub>0.4</sub> Se <sub>2</sub> NWs                | 89;                                                     | 0.0005-6;            |                                      |            |
|                                                                           | 31.8                                                    | 6-15                 | 0.16                                 | 12         |
| Vit.B <sub>12</sub> -NGr                                                  | 4.08                                                    | 0.02 -0.168          | -                                    | 13         |
| Gox/CoS-MWCNTs                                                            | 15                                                      | 0.008 - 1.5          | 5                                    | 14         |
| NiCo <sub>2</sub> O <sub>4</sub> /CoNiO <sub>2</sub> @pRGO <sub>600</sub> | 1.295;                                                  | 0.005–3;             |                                      |            |
|                                                                           | 0.936                                                   | 3–12                 | 0.41                                 | 15         |
| Fe <sub>0.06</sub> Co <sub>0.04</sub> @NPC-950                            | 794                                                     | 0.004-8              | 0.13                                 | This work. |

**Table S3.** Summarized results for the detection of H<sub>2</sub>O<sub>2</sub> in real samples by using Fe<sub>0.06</sub>Co<sub>0.04</sub>@NPC-950.

| Samples      | Added (μM) | Found (μM) | Recovery (%) | R.S.D (%) <sup>a</sup> |
|--------------|------------|------------|--------------|------------------------|
| Milk         | 10         | 8.96       | 89.6         | 1.12                   |
| Orange juice | 10         | 9.72       | 97.2         | 1.07                   |
| Serum        | 10         | 10.28      | 102.8        | 0.78                   |

<sup>a</sup> Relative standard deviation estimated from three separated experiments

## References:

1. G. He, F. Gao, W. Li, P. Li, X. Zhang, H. Yin, B. Yang, Y. Liu and S. Zhang, *Anal. Methods*, 2019, **11**, 1651-1656.
2. M. Hassan, Y. Jiang, X. Bo and M. Zhou, *Talanta*, 2018, **188**, 339-348.
3. X. Xiong, C. You, X. Cao, L. Pang, R. Kong and X. Sun, *Electrochim. Acta*, 2017, **253**, 517-521.
4. F. Xie, X. Cao, F. Qu, A. M. Asiri and X. Sun, *Sens. Actuators, B*, 2018, **255**, 1254-1261.
5. Y. Zhao, D. Huo, J. Bao, M. Yang, M. Chen, J. Hou, H. Fa and C. Hou, *Sens. Actuators, B*, 2017, **244**, 1037-1044.
6. X. Chen, J. Gao, G. Zhao and C. Wu, *Sens. Actuators, B*, 2020, **313**, 128038.
7. Y. Dong and J. Zheng, *Sens. Actuators, B*, 2020, **311**, 127918.
8. T. Liu, Y. Guo, Z. Zhang, Z. Miao, X. Zhang and Z. Su, *Sens. Actuators, B*, 2019, **286**, 370-376.
9. Z. M. Sheng, Z. Z. Gan, H. Huang, R. L. Niu, Z. W. Han and R. P. Jia, *Sens. Actuators, B*, 2020, **305**, 127550.
10. Y. Li, P. Kamdem and X. J. Jin, *Dalton Trans*, 2020, **49**, 7807-7819.
11. Y.-S. Chang, J.-H. Li, Y.-C. Chen, W. H. Ho, Y.-D. Song and C.-W. Kung, *Electrochim. Acta*, 2020, **347**, 136276.
12. Z. Rahmati, M. Roushani and H. Hosseini, *Sens. Actuators, B*, 2020, **324**, 128730.
13. S. A. Bhat, N. Rashid, M. A. Rather, S. A. Pandit, P. P. Ingole and M. A. Bhat, *Electrochim. Acta*, 2020, **337**, 135730.
14. J. Li, Y. Liu, X. Tang, L. Xu, L. Min, Y. Xue, X. Hu and Z. Yang, *Microchim Acta*, 2020, **187**, 80.
15. M. Wang, C. Wang, Y. Liu, B. Hu, L. He, Y. Ma, Z. Zhang, B. Cui and M. Du, *Microchim Acta*, 2020, **187**, 436.
